# Supplementary material for: A mechanistic insight into rhodium-doped gold clusters as a better hydrogenation catalyst
Source: Royal Society of Chemistry journal article supplement (doi:10.1039/c9nr10258b), 2020-01-01
Supplement: c9nr10258b1.pdf [file c9nr10258b1.pdf]

Supporting Information

## **A Mechanistic Insight into Rhodium–Doped Gold Clusters as a Better Hydrogenation Catalyst**

**Turbasu Sengupta, Jin Suk Chung\*, and Sung Gu Kang\***

School of Chemical Engineering, University of Ulsan, 93 Daehakro, Nam-Gu, Ulsan 44610, South Korea

\*(J.S.C.) E-mail: jschung@mail.ulsan.ac.kr.

\*(S.G.K.) E-mail: sgkang@mail.ulsan.ac.kr.

**\*To whom correspondence should be addressed**

## *Content Index*

| Title                                                                                     | Page Number |
|-------------------------------------------------------------------------------------------|-------------|
| 1. Thermodynamic Data (in a.u) of Ethylene Hydrogenation on Au <sub>8</sub> Cluster       | S3          |
| 2. Thermodynamic Data (in a.u) of Ethylene Hydrogenation on Au <sub>20</sub> Cluster      | S3          |
| 3. Thermodynamic Data (in a.u) of Ethylene Hydrogenation on Au <sub>8</sub> Rh Cluster    | S3-S4       |
| 4. Thermodynamic Data (in a.u) of Ethylene Hydrogenation on Au <sub>20</sub> Rh Cluster   | S4-S5       |
| 5. Thermodynamic Data (in a.u) of Ethylene and H <sub>2</sub>                             | S5          |
| 6. Relative Energies of the TS of H <sub>2</sub> Dissociation on Au <sub>20</sub> cluster | S6          |
| 7. Relative Energies of the Ethylene Adsorbed Complex of Au <sub>8</sub> Rh cluster       | S7-S8       |
| 8. Relative Energies of the Ethylene Adsorbed Complex of Au <sub>20</sub> Rh cluster      | S9-S12      |

# 1. Thermodynamic Data (in a.u) of Ethylene Hydrogenation on Au<sub>8</sub> Cluster [DFT:B3LYP-D3(BJ)/def2-TZVP (Rh,C,H)+LANL2DZ(f) (Au)]

## Gas Phase

|   | Cluster      | 2            | 3            | 4            | 5*           | 6            | 7            | 8*           | 9            | 10*          | 11           | 12           |
|---|--------------|--------------|--------------|--------------|--------------|--------------|--------------|--------------|--------------|--------------|--------------|--------------|
| E | -1084.038198 | -1162.640993 | -1163.813651 | -1163.808307 | -1163.786859 | -1163.791957 | -1163.81996  | -1163.763914 | -1163.826904 | -1163.773777 | -1163.835015 | -1163.841846 |
| U | -1084.021325 | -1162.620005 | -1163.789107 | -1163.784335 | -1163.765246 | -1163.770182 | -1163.798807 | -1163.742899 | -1163.80562  | -1163.752613 | -1163.812533 | -1163.81944  |
| H | -1084.020381 | -1162.619061 | -1163.788163 | -1163.783391 | -1163.764302 | -1163.769238 | -1163.797863 | -1163.741955 | -1163.804676 | -1163.751669 | -1163.811589 | -1163.818496 |
| G | -1084.10141  | -1162.710189 | -1163.888144 | -1163.878653 | -1163.852791 | -1163.858043 | -1163.885268 | -1163.830851 | -1163.893152 | -1163.839693 | -1163.905372 | -1163.913711 |

## Solvent Phase

(Solvent Model: SMD, Solvent: Ethanol)

|   | Cluster      | 2            | 3            | 4            | 5*           | 6            | 7            | 8*           | 9            | 10*          | 11           | 12           |
|---|--------------|--------------|--------------|--------------|--------------|--------------|--------------|--------------|--------------|--------------|--------------|--------------|
| E | -1084.034765 | -1162.638403 | -1163.810352 | -1163.804497 | -1163.78343  | -1163.788875 | -1163.816396 | -1163.760672 | -1163.823611 | -1163.771514 | -1163.83163  | -1163.838665 |
| U | -1084.017904 | -1162.61746  | -1163.785955 | -1163.780565 | -1163.761809 | -1163.767095 | -1163.795256 | -1163.739673 | -1163.802362 | -1163.750348 | -1163.809238 | -1163.816331 |
| H | -1084.01696  | -1162.616516 | -1163.785011 | -1163.779621 | -1163.760865 | -1163.766151 | -1163.794311 | -1163.738728 | -1163.801418 | -1163.749404 | -1163.808294 | -1163.815387 |
| G | -1084.097244 | -1162.707064 | -1163.88346  | -1163.874771 | -1163.849418 | -1163.854989 | -1163.881637 | -1163.827483 | -1163.889684 | -1163.837451 | -1163.901584 | -1163.909762 |

# 2. Thermodynamic Data (in a.u) of Ethylene Hydrogenation on Au<sub>20</sub> Cluster [DFT:B3LYP-D3(BJ)/def2-TZVP (Rh,C,H)+LANL2DZ(f) (Au)]

## Gas Phase

|   | Cluster      | 2            | 3            | 4*           | 5            | 6*           | 7            | 8*           | 9            | 10*          | 11           |
|---|--------------|--------------|--------------|--------------|--------------|--------------|--------------|--------------|--------------|--------------|--------------|
| E | -2710.412212 | -2789.005905 | -2790.177516 | -2790.126909 | -2790.134462 | -2790.114689 | -2790.161611 | -2790.141146 | -2790.183183 | -2790.132508 | -2790.220736 |
| U | -2710.367206 | -2788.957275 | -2790.12445  | -2790.076621 | -2790.083698 | -2790.065195 | -2790.111855 | -2790.091561 | -2790.133806 | -2790.082529 | -2790.170072 |
| H | -2710.366261 | -2788.95633  | -2790.123506 | -2790.075677 | -2790.082754 | -2790.06425  | -2790.11091  | -2790.090617 | -2790.132862 | -2790.081585 | -2790.169127 |
| G | -2710.518828 | -2789.118732 | -2790.298753 | -2790.243833 | -2790.251603 | -2790.22899  | -2790.276847 | -2790.256563 | -2790.296278 | -2790.247142 | -2790.338159 |

## Solvent Phase

(Solvent Model: SMD, Solvent: Ethanol)

|   | Cluster      | 2            | 3            | 4*           | 5            | 6*           | 7            | 8*           | 9            | 10*          | 11           |
|---|--------------|--------------|--------------|--------------|--------------|--------------|--------------|--------------|--------------|--------------|--------------|
| E | -2710.405614 | -2789.00012  | -2790.171101 | -2790.121304 | -2790.12851  | -2790.108178 | -2790.155366 | -2790.135091 | -2790.177056 | -2790.126842 | -2790.214093 |
| U | -2710.360624 | -2788.951536 | -2790.118187 | -2790.071087 | -2790.077835 | -2790.058715 | -2790.105634 | -2790.085524 | -2790.127735 | -2790.076906 | -2790.163549 |
| H | -2710.35968  | -2788.950592 | -2790.117243 | -2790.070143 | -2790.076891 | -2790.057771 | -2790.10469  | -2790.08458  | -2790.126791 | -2790.075962 | -2790.162605 |
| G | -2710.512138 | -2789.112731 | -2790.290629 | -2790.237578 | -2790.245224 | -2790.222381 | -2790.270597 | -2790.250535 | -2790.289717 | -2790.241342 | -2790.330494 |

# 3. Thermodynamic Data (in a.u) of Ethylene Hydrogenation on Au<sub>8</sub>Rh Cluster [DFT:B3LYP-D3(BJ)/def2-TZVP (Rh,C,H)+LANL2DZ(f) (Au)]

## (G Pathway)

## Gas Phase

|   | Cluster      | 2G           | 3G           | 4G*          | 5G           | 6G           | 7G*          | 8G           | 9G*          | 10G          | 11G*         | 12           | 13*          | 14           |
|---|--------------|--------------|--------------|--------------|--------------|--------------|--------------|--------------|--------------|--------------|--------------|--------------|--------------|--------------|
| E | -1194.683689 | -1273.301072 | -1274.471804 | -1274.445948 | -1274.446747 | -1274.471305 | -1274.45074  | -1274.48279  | -1274.478354 | -1274.481228 | -1274.463832 | -1274.469474 | -1274.462404 | -1274.492595 |
| U | -1194.664701 | -1273.278918 | -1274.44658  | -1274.422703 | -1274.423454 | -1274.448294 | -1274.427894 | -1274.459742 | -1274.455572 | -1274.458367 | -1274.441019 | -1274.446255 | -1274.439301 | -1274.468351 |
| H | -1194.663756 | -1273.277973 | -1274.445636 | -1274.421759 | -1274.42251  | -1274.44735  | -1274.42695  | -1274.458798 | -1274.454628 | -1274.457423 | -1274.440075 | -1274.44531  | -1274.438357 | -1274.467407 |
| G | -1194.747202 | -1273.368304 | -1274.542649 | -1274.513452 | -1274.514079 | -1274.539921 | -1274.518401 | -1274.550273 | -1274.545389 | -1274.548293 | -1274.532714 | -1274.537827 | -1274.530984 | -1274.564003 |

**Solvent Phase**  
(Solvent Model: SMD, Solvent: Ethanol)

|   | Cluster      | 2G           | 3G           | 4G*          | 5G           | 6G           | 7G*          | 8G           | 9G*          | 10G          | 11G*         | 12           | 13*          | 14           |
|---|--------------|--------------|--------------|--------------|--------------|--------------|--------------|--------------|--------------|--------------|--------------|--------------|--------------|--------------|
| E | -1194.679757 | -1273.296771 | -1274.46719  | -1274.44159  | -1274.442435 | -1274.466776 | -1274.446719 | -1274.478559 | -1274.474552 | -1274.477694 | -1274.460446 | -1274.465987 | -1274.458927 | -1274.488775 |
| U | -1194.660774 | -1273.274631 | -1274.442187 | -1274.418361 | -1274.419164 | -1274.443784 | -1274.423897 | -1274.455525 | -1274.451783 | -1274.454848 | -1274.437656 | -1274.442829 | -1274.435872 | -1274.46462  |
| H | -1194.659829 | -1273.273687 | -1274.441242 | -1274.417416 | -1274.41822  | -1274.44284  | -1274.422952 | -1274.454581 | -1274.450838 | -1274.453903 | -1274.436712 | -1274.441885 | -1274.434928 | -1274.463676 |
| G | -1194.743264 | -1273.36417  | -1274.537377 | -1274.509052 | -1274.509697 | -1274.535257 | -1274.514366 | -1274.546009 | -1274.541593 | -1274.544741 | -1274.52904  | -1274.533797 | -1274.52748  | -1274.559654 |

**(R Pathway)**  
**Gas Phase**

|   | Cluster      | 2R           | 3R           | 4R*          | 5R           | 6R*          | 12           | 13*          | 14           |
|---|--------------|--------------|--------------|--------------|--------------|--------------|--------------|--------------|--------------|
| E | -1194.683689 | -1273.295162 | -1274.467784 | -1274.466187 | -1274.47006  | -1274.461539 | -1274.469474 | -1274.462404 | -1274.492595 |
| U | -1194.664701 | -1273.27283  | -1274.444204 | -1274.443209 | -1274.446967 | -1274.438699 | -1274.446255 | -1274.439301 | -1274.468351 |
| H | -1194.663756 | -1273.271885 | -1274.44326  | -1274.442265 | -1274.446023 | -1274.437755 | -1274.44531  | -1274.438357 | -1274.467407 |
| G | -1194.747202 | -1273.362099 | -1274.535184 | -1274.533791 | -1274.537945 | -1274.529893 | -1274.537827 | -1274.530984 | -1274.564003 |

**Solvent Phase**  
(Solvent Model: SMD, Solvent: Ethanol)

|   | Cluster      | 2R           | 3R           | 4R*          | 5R           | 6R*          | 12           | 13*          | 14           |
|---|--------------|--------------|--------------|--------------|--------------|--------------|--------------|--------------|--------------|
| E | -1194.679757 | -1273.291331 | -1274.463994 | -1274.462117 | -1274.465925 | -1274.457903 | -1274.465987 | -1274.458927 | -1274.488775 |
| U | -1194.660774 | -1273.269023 | -1274.440463 | -1274.439145 | -1274.442856 | -1274.435043 | -1274.442829 | -1274.435872 | -1274.46462  |
| H | -1194.659829 | -1273.268079 | -1274.439519 | -1274.438201 | -1274.441912 | -1274.434099 | -1274.441885 | -1274.434928 | -1274.463676 |
| G | -1194.743264 | -1273.358202 | -1274.531287 | -1274.529728 | -1274.533721 | -1274.526554 | -1274.533797 | -1274.52748  | -1274.559654 |

**4. Thermodynamic Data (in a.u.) of Ethylene Hydrogenation on Au<sub>20</sub>Rh Cluster**  
[DFT:B3LYP-D3(BJ)/def2-TZVP (Rh,C,H)+LANL2DZ(f) (Au)]

**(G Pathway)**  
**Gas Phase**

|   | Cluster      | 2G           | 3G           | 4G*          | 5G           | 6G*          | 7G           | 8G*          | 9G           | 10G*         | 11           | 12           | 13           |
|---|--------------|--------------|--------------|--------------|--------------|--------------|--------------|--------------|--------------|--------------|--------------|--------------|--------------|
| E | -2821.052811 | -2899.66704  | -2900.836657 | -2900.792951 | -2900.828537 | -2900.815781 | -2900.830862 | -2900.824796 | -2900.830514 | -2900.808835 | -2900.839686 | -2900.830053 | -2900.865448 |
| U | -2821.005633 | -2899.616501 | -2900.782749 | -2900.741459 | -2900.776874 | -2900.764381 | -2900.779531 | -2900.773756 | -2900.779347 | -2900.757232 | -2900.788275 | -2900.7787   | -2900.813123 |
| H | -2821.004689 | -2899.615557 | -2900.781805 | -2900.740514 | -2900.77593  | -2900.763437 | -2900.778587 | -2900.772812 | -2900.778402 | -2900.756288 | -2900.787331 | -2900.777756 | -2900.812179 |
| G | -2821.164759 | -2899.782178 | -2900.956427 | -2900.90846  | -2900.944435 | -2900.932069 | -2900.946323 | -2900.940264 | -2900.945854 | -2900.92616  | -2900.955261 | -2900.946826 | -2900.984819 |

**Solvent Phase**  
(Solvent Model: SMD, Solvent: Ethanol)

|   | Cluster      | 2G           | 3G           | 4G*          | 5G           | 6G*          | 7G           | 8G*          | 9G           | 10G*         | 11           | 12           | 13           |
|---|--------------|--------------|--------------|--------------|--------------|--------------|--------------|--------------|--------------|--------------|--------------|--------------|--------------|
| E | -2821.045939 | -2899.660324 | -2900.829131 | -2900.786077 | -2900.82168  | -2900.80885  | -2900.823976 | -2900.818369 | -2900.824322 | -2900.802706 | -2900.833385 | -2900.823928 | -2900.858875 |
| U | -2820.998774 | -2899.60981  | -2900.775366 | -2900.734621 | -2900.77004  | -2900.757509 | -2900.772675 | -2900.767353 | -2900.773192 | -2900.75115  | -2900.781995 | -2900.772635 | -2900.806601 |
| H | -2820.99783  | -2899.608866 | -2900.774422 | -2900.733677 | -2900.769096 | -2900.756565 | -2900.771731 | -2900.766408 | -2900.772248 | -2900.750206 | -2900.781051 | -2900.771691 | -2900.805657 |
| G | -2821.157815 | -2899.775376 | -2900.948422 | -2900.901472 | -2900.937517 | -2900.924872 | -2900.939341 | -2900.933769 | -2900.939562 | -2900.919821 | -2900.948941 | -2900.940383 | -2900.978158 |

**(R Pathway)**  
**Gas Phase**

|   | Cluster      | 2R           | 3R           | 4R*          | 5R           | 6R*          | 11           | 12           | 13           |
|---|--------------|--------------|--------------|--------------|--------------|--------------|--------------|--------------|--------------|
| E | -2821.052811 | -2899.666109 | -2900.844099 | -2900.839932 | -2900.84091  | -2900.830235 | -2900.839686 | -2900.830053 | -2900.865448 |
| U | -2821.005633 | -2899.6156   | -2900.792603 | -2900.788684 | -2900.789535 | -2900.779245 | -2900.788275 | -2900.7787   | -2900.813123 |
| H | -2821.004689 | -2899.614656 | -2900.791659 | -2900.78774  | -2900.788591 | -2900.778301 | -2900.787331 | -2900.777756 | -2900.812179 |
| G | -2821.164759 | -2899.78085  | -2900.958828 | -2900.954886 | -2900.956227 | -2900.945331 | -2900.955261 | -2900.946826 | -2900.984819 |

**Solvent Phase**  
(Solvent Model: SMD, Solvent: Ethanol)

|          | Cluster      | 2R           | 3R           | 4R*          | 5R           | 6R*          | 11           | 12           | 13           |
|----------|--------------|--------------|--------------|--------------|--------------|--------------|--------------|--------------|--------------|
| <b>E</b> | -2821.045939 | -2899.659076 | -2900.836997 | -2900.832794 | -2900.833932 | -2900.823958 | -2900.833385 | -2900.823928 | -2900.858875 |
| <b>U</b> | -2820.998774 | -2899.608585 | -2900.785537 | -2900.781577 | -2900.78258  | -2900.772983 | -2900.781995 | -2900.772635 | -2900.806601 |
| <b>H</b> | -2820.99783  | -2899.607641 | -2900.784593 | -2900.780633 | -2900.781635 | -2900.772039 | -2900.781051 | -2900.771691 | -2900.805657 |
| <b>G</b> | -2821.157815 | -2899.773852 | -2900.951633 | -2900.947639 | -2900.949202 | -2900.939012 | -2900.948941 | -2900.940383 | -2900.978158 |

**5. Thermodynamic Data (in a.u) of Ethylene and H<sub>2</sub>**  
**Gas Phase**

|          | Ethylene   | H <sub>2</sub> |
|----------|------------|----------------|
| <b>E</b> | -78.576752 | -1.169725      |
| <b>U</b> | -78.573713 | -1.167365      |
| <b>H</b> | -78.572769 | -1.166421      |
| <b>G</b> | -78.597615 | -1.181216      |

**Solvent Phase**  
(Solvent Model: SMD, Solvent: Ethanol)

|          | Ethylene   | H <sub>2</sub> |
|----------|------------|----------------|
| <b>E</b> | -78.574839 | -1.169031      |
| <b>U</b> | -78.571802 | -1.166671      |
| <b>H</b> | -78.570858 | -1.165727      |
| <b>G</b> | -78.5957   | -1.180522      |

## 6. Relative Energies of the TS of H<sub>2</sub> Dissociation on Au<sub>20</sub> cluster

[DFT:B3LYP-D3(BJ)/def2-TZVP (Rh,C,H)+LANL2DZ(f) (Au)]

Lowest Energy structure is highlighted in bold font

| Transition States                                                                   | Energy in a.u.<br>(E+ZPE) | Relative Energies<br>(kcal/mol) | Imaginary Freq<br>(cm <sup>-1</sup> ) |
|-------------------------------------------------------------------------------------|---------------------------|---------------------------------|---------------------------------------|
| 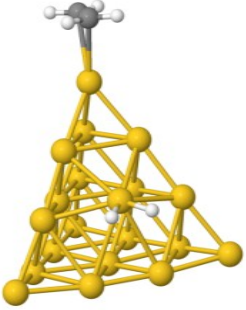   | -2790.123924              | 1.87                            | 711.1644i                             |
|   | -2790.122241              | 2.92                            | 570.9132i                             |
|  | -2790.125681              | 0.77                            | 559.4148i                             |
|  | <b>-2790.126909</b>       | <b>0</b>                        | <b>893.8893i</b>                      |

## 7. Relative Energies of the Ethylene Adsorbed Complex of Au<sub>8</sub>Rh cluster

[ABCluster+Gaussian16]

Lowest Energy structure is highlighted in bold font

| Geometries                                                                          | Relative Energies (kcal/mol) |
|-------------------------------------------------------------------------------------|------------------------------|
| 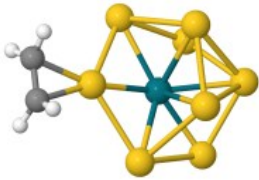   | 10.43994662                  |
|    | 9.578814648                  |
|   | 11.61935167                  |
|  | 12.754329                    |
|  | 9.008345307                  |

|                                                                                   |             |
|-----------------------------------------------------------------------------------|-------------|
| 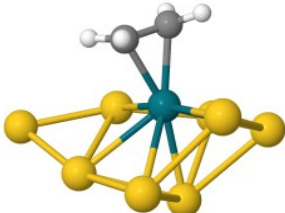 | <b>0</b>    |
|  | 11.21103091 |
|  | 14.69063661 |



## 8. Relative Energies of the Ethylene Adsorbed Complex of Au<sub>20</sub>Rh cluster

[ABCluster+Gaussian16]

Lowest Energy structure is highlighted in bold font

| Geometries                                                                          | Relative Energies (kcal/mol) |
|-------------------------------------------------------------------------------------|------------------------------|
| 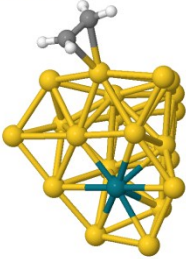   | 15.66911295                  |
|    | 13.91296347                  |
|   | 10.74880704                  |
|  | 15.05911048                  |
|  | 16.87305364                  |
|  | 13.34036059                  |

|                                                                                     |             |
|-------------------------------------------------------------------------------------|-------------|
| 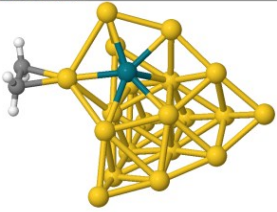    | 5.179781295 |
|    | 1.725778002 |
|    | 17.77208722 |
|   | 10.73719811 |
|  | 13.79806639 |
|  | 17.62173582 |
|  | <b>0</b>    |

|                                                                                     |             |
|-------------------------------------------------------------------------------------|-------------|
| 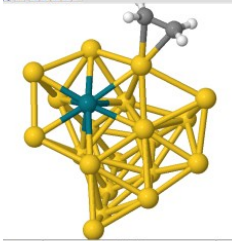   | 13.28407294 |
|    | 15.49271989 |
|    | 12.61696706 |
|   | 14.77020488 |
|  | 13.51499662 |
|  | 14.42130932 |
|  | 17.23067159 |

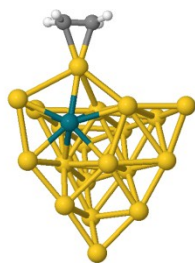

4.468812465
